# Supplementary material for: Reversible switching of liquid crystal micro-particles in a nematic liquid crystal
Source: Royal Society of Chemistry journal article supplement (doi:10.1039/c5sm01956g), 2015-10-22
Supplement: c5sm01956g1.pdf [file c5sm01956g1.pdf]

## Electronic Supplementary Information

### Reversible switching of liquid crystal micro-particles in a nematic liquid crystal

Koki Imamura, Hiroyuki Yoshida,\* and Masanori Ozaki

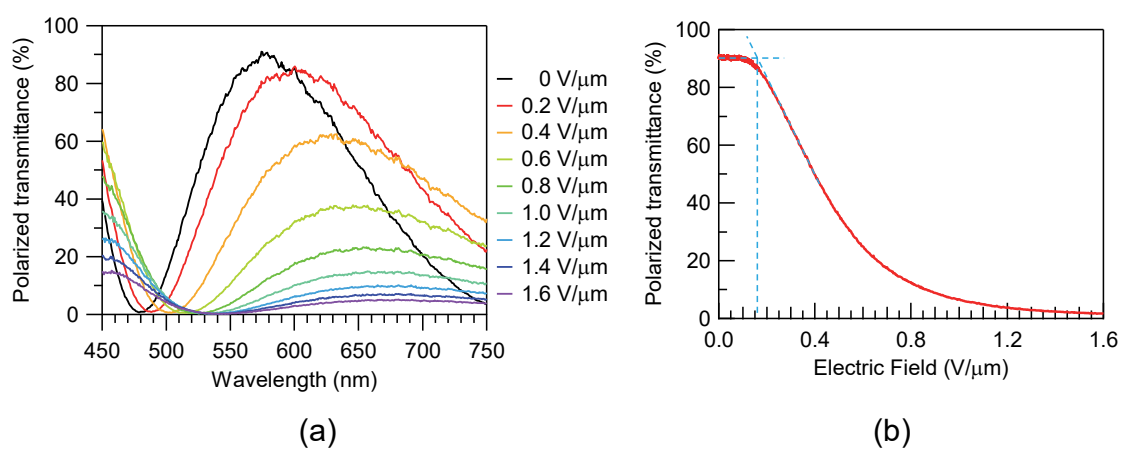

**Supplementary Figure 1:** (a) Polarized transmittance spectra of host 5CB (in the absence of particles) at various electric fields measured with a multichannel spectrometer (Hamamatsu Photonics, PMA-11). (b) Electric field dependence of the polarized transmittance at 580 nm, which corresponds to the transmittance peak at 0 V/μm. A threshold is observed at  $\sim 0.16 \text{ V } \mu\text{m}^{-1}$  (judging from the dashed blue lines).

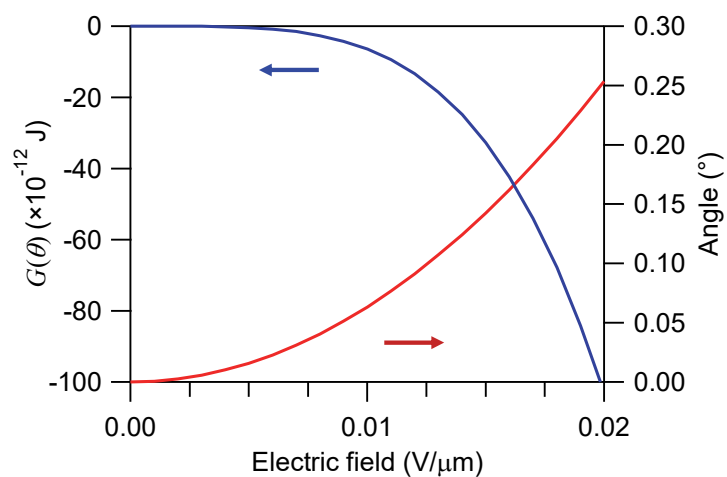

**Supplementary Figure 2:** Calculated free energy  $G(\theta)$  and rotation angle of particles at low fields.

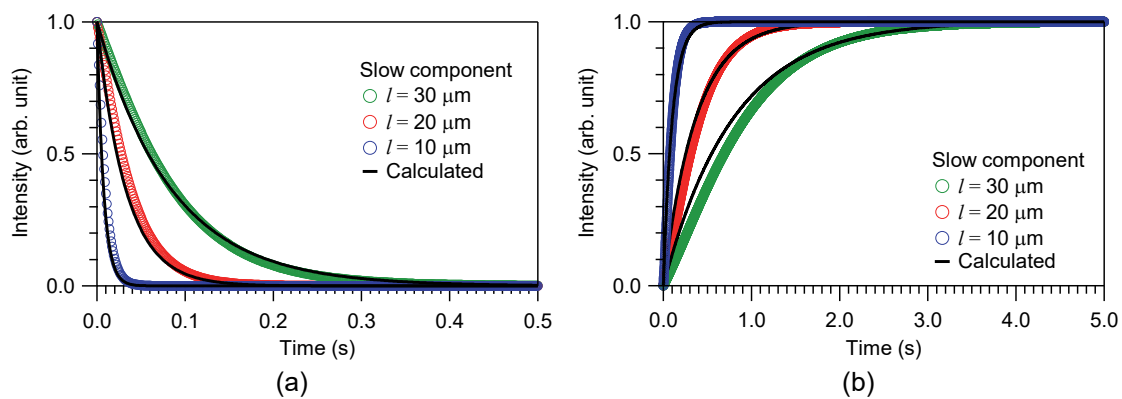

**Supplementary Figure 3:** (a) Applied and (b) removed electric field dependence of slow component of response curve and its calculated value with different sizes of particles.

**Supplementary Movie 1:** Demonstration of the reversible switching of a  $10 \mu\text{m}$  particle driven by an electric field ( $1.0 \text{ V } \mu\text{m}^{-1}$ ). The motion of the particle is recorded on a polarized optical microscope equipped with a video camera.
